# Supplementary material
Source: PubMed Central journal article supplement (PMC4063844)
Supplement: gmic-5-192-s01.pdf [file gmic-5-192-s01.pdf]

## **Supplemental Material to:**

**Joann Romano-Keeler, Daniel J Moore,  
Chunlin Wang, Robert M Brucker, Christopher  
Fonnesbeck, James C Slaughter, Haijing Li,  
Danielle P Curran, Shufang Meng, Hernan  
Correa, Harold N Lovvorn III, Yi-Wei Tang, Seth  
Bordenstein, Alfred L George Jr, and Jörn-  
Hendrik Weitekamp**

**Early life establishment of site-specific microbial  
communities in the gut**

**Gut Microbes 2013; 5(2)**

**<http://dx.doi.org/10.4161/gmic.28442>**

**[http://www.landesbioscience.com/journals/gutmicrobes/  
article/28442/](http://www.landesbioscience.com/journals/gutmicrobes/article/28442/)**

**Supplemental Table 1.** Tissue and fecal bacterial DNA loads are independent of diversity metrics (Simpson’s inverse index, Shannon-Wiener, and Chao1) based on real-time PCR for samples from twelve study patients.

| Patient ID | Tissue bacterial DNA load<br>[log <sub>2</sub> (fold change over<br>median bacterial content)] | Simpson’s<br>inverse<br>index | Shannon | Chao 1 | Fecal bacterial DNA load<br>[log <sub>2</sub> (fold change over<br>median bacterial content)] | Simpson’s | Shannon | Chao 1 |
|------------|------------------------------------------------------------------------------------------------|-------------------------------|---------|--------|-----------------------------------------------------------------------------------------------|-----------|---------|--------|
| 1          | 1.11                                                                                           | 16.44                         | 3.75    | 551    | 0.80                                                                                          | 13.91     | 3.57    | 527    |
| 2          | -3.43                                                                                          | 6.37                          | 2.90    | 548    | -0.34                                                                                         | 3.12      | 2.03    | 375    |
| 3          | 1.25                                                                                           | 4.55                          | 2.25    | 147    | -1.55                                                                                         | 5.07      | 2.18    | 163    |
| 7          | -0.54                                                                                          | 12.44                         | 3.46    | 236    | -2.38                                                                                         | 13.35     | 3.24    | 122    |
| 8          | 0.99                                                                                           | 3.75                          | 2.38    | 101    | -5.03                                                                                         | 3.84      | 2.17    | 141    |
| 9          | -4.49                                                                                          | 4.07                          | 2.52    | 152    | -4.39                                                                                         | 3.22      | 1.81    | 35     |
| 10         | 1.40                                                                                           | 23.66                         | 3.91    | 331    | 3.62                                                                                          | 3.50      | 2.16    | 57     |
| 11         | 1.51                                                                                           | 7.82                          | 2.70    | 171    | -1.91                                                                                         | 3.04      | 1.91    | 153    |
| 12         | 0.27                                                                                           | 4.48                          | 2.19    | 88     | -1.31                                                                                         | 4.13      | 2.07    | 48     |
| 13         | 1.17                                                                                           | 1.62                          | 1.30    | 97     | 4.36                                                                                          | 1.99      | 1.36    | 74     |
| 14         | 1.26                                                                                           | 1.75                          | 1.10    | 90     | -3.65                                                                                         | 2.86      | 1.76    | 46     |
| 15         | -1.85                                                                                          | 11.10                         | 3.38    | 226    | 2.78                                                                                          | 2.03      | 1.54    | 59     |

**Supplemental Table 2.** Total number of operational taxonomic units (OTUs) for each phyla (Patients 1-15), both fecal and tissue samples.

|            |        | Firmicutes | Proteobacteria | Actinobacteria | Bacteroidetes | Rare Phyla |
|------------|--------|------------|----------------|----------------|---------------|------------|
| Patient 1  | Tissue | 632        | 1638           | 569            | 115           | 114        |
|            | Feces  | 305        | 3886           | 648            | 380           | 277        |
| Patient 2  | Tissue | 136        | 2469           | 1590           | 67            | 195        |
|            | Feces  | 4182       | 1821           | 4              | 0             | 18         |
| Patient 3  | Tissue | 1174       | 839            | 25             | 0             | 42         |
|            | Feces  | 703        | 661            | 2              | 0             | 2          |
| Patient 4  | Tissue | 408        | 4414           | 259            | 85            | 316        |
|            | Feces  | 3946       | 18             | 300            | 5             | 43         |
| Patient 5  | Tissue | 831        | 12044          | 568            | 143           | 202        |
|            | Feces  | 8605       | 83             | 7              | 7             | 40         |
| Patient 6  | Tissue | 693        | 2310           | 1102           | 678           | 116        |
|            | Feces  | 50         | 12             | 9              | 2             | 0          |
| Patient 7  | Tissue | 718        | 3053           | 678            | 4829          | 527        |
|            | Feces  | 717        | 547            | 377            | 209           | 12         |
| Patient 8  | Tissue | 173        | 395            | 260            | 74            | 357        |
|            | Feces  | 33         | 2174           | 58             | 651           | 11         |
| Patient 9  | Tissue | 228        | 2651           | 424            | 169           | 106        |
|            | Feces  | 80         | 767            | 233            | 254           | 11         |
| Patient 10 | Tissue | 162        | 1195           | 548            | 106           | 67         |
|            | Feces  | 3196       | 76             | 21             | 10            | 14         |
| Patient 11 | Tissue | 372        | 6857           | 201            | 73            | 203        |
|            | Feces  | 32         | 795            | 83             | 381           | 6          |
| Patient 12 | Tissue | 4255       | 483            | 42             | 30            | 392        |
|            | Feces  | 4361       | 666            | 75             | 359           | 6          |
| Patient 13 | Tissue | 107        | 2950           | 109            | 51            | 28         |
|            | Feces  | 1667       | 3994           | 59             | 51            | 25         |
| Patient 14 | Tissue | 96         | 1541           | 51             | 2473          | 12         |
|            | Feces  | 223        | 816            | 183            | 2314          | 22         |
| Patient 15 | Tissue | 281        | 1307           | 310            | 102           | 305        |
|            | Feces  | 2377       | 53             | 204            | 33            | 32         |
